# Supplementary material
Source: JCI journal article supplement (doi:10.1172/jci171488)
Supplement: sd1 [file 1]

**SUPPLEMENTAL MATERIAL****IRF5 governs macrophage adventitial infiltration to fuel abdominal aortic aneurysm formation**

Yidong Wang<sup>1</sup>; Zhenjie Liu<sup>2</sup>; Shen Song<sup>3</sup>; Jianfang Wang<sup>1</sup>; Chunna Jin<sup>1</sup>;  
Liangliang Jia<sup>1</sup>; Yuankun Ma<sup>1</sup>; Tan Yuan<sup>1</sup>; Zhejun Cai<sup>1</sup>; Meixiang Xiang<sup>1</sup>

1. Department of Cardiology, State Key Laboratory of Transvascular Implantation Devices, Provincial Key Laboratory of Cardiovascular Research, The Second Affiliated Hospital Zhejiang University School of Medicine, 88 Jiefang Rd, Hangzhou 310009, P.R. China

2. Department of Vascular Surgery, The second Affiliated Hospital of Zhejiang University School of Medicine, 88 Jiefang Rd, Hangzhou 310009, P.R. China

3. State Key Laboratory of Cardiovascular Disease, Fuwai Hospital, National Center for Cardiovascular Disease, Chinese Academy of Medical Sciences and Peking Union Medical College, Beijing, China

## 23 Supplemental Figures

24

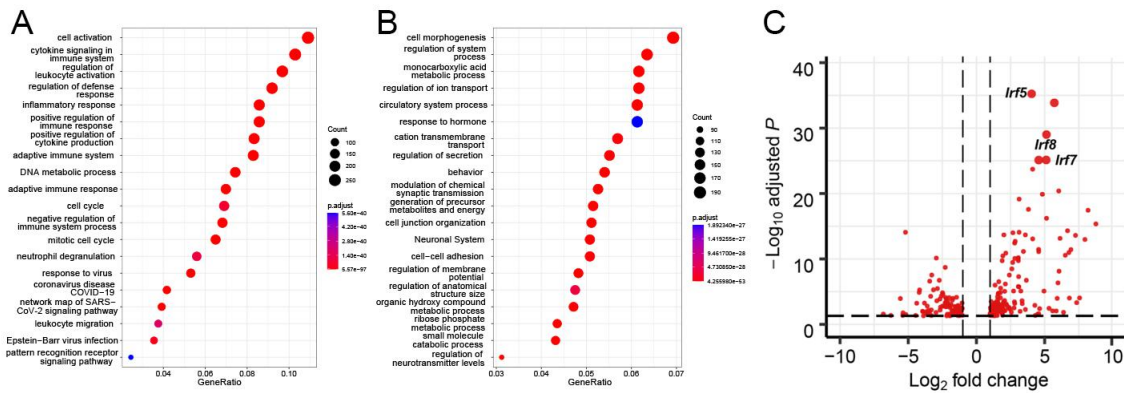

25

26 Supplemental Figure 1. Identification of *Irf5* as a potentially pivotal player in

## 27 adventitial inflammation

28 (A and B) Dotplot represents enrichment analysis of genes corresponding to the

29 up-regulated and down-regulated differentially expressed genes, respectively, between

30 normal aorta adventitia and AAA adventitia. Enrichment analysis was performed with

31 Metascape with a cutoff  $P$  adjusted  $< 0.05$  and  $\log_2$ fold change  $> 1$ . The top 20 gene

32 ontologies were listed. (C) Volcano plot representing the transcription levels for

33 differentially expressed transcription factors. *Irf5*, *Runx3*, *Irf8*, *Runx1*, and *Irf7* were the top

34 5 up-regulated genes in AAA adventitia.

35

36

37

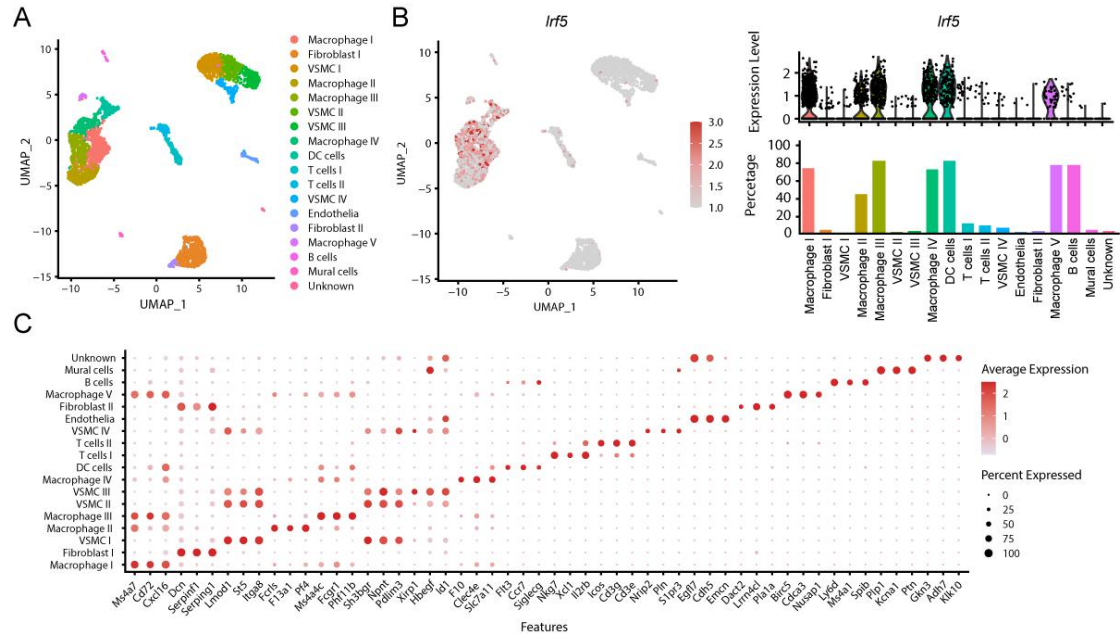

38

39 **Supplemental Figure 2. Cell-specific expression of *Irf5* in single-cell sequencing of**  
 40 **the elastase-induced AAA.**

41 **(A)** Cluster analysis of single-cell sequencing data of elastase-induced AAA. **(B)**  
 42 Expression pattern of *Irf5* in each cell cluster (left), and the relative abundance of *Irf5*  
 43 positive cells in each cell population (right). **(C)** Top 3 genes which specific expressed in  
 44 each cell cluster are visualized by dot plot.

45

46

A

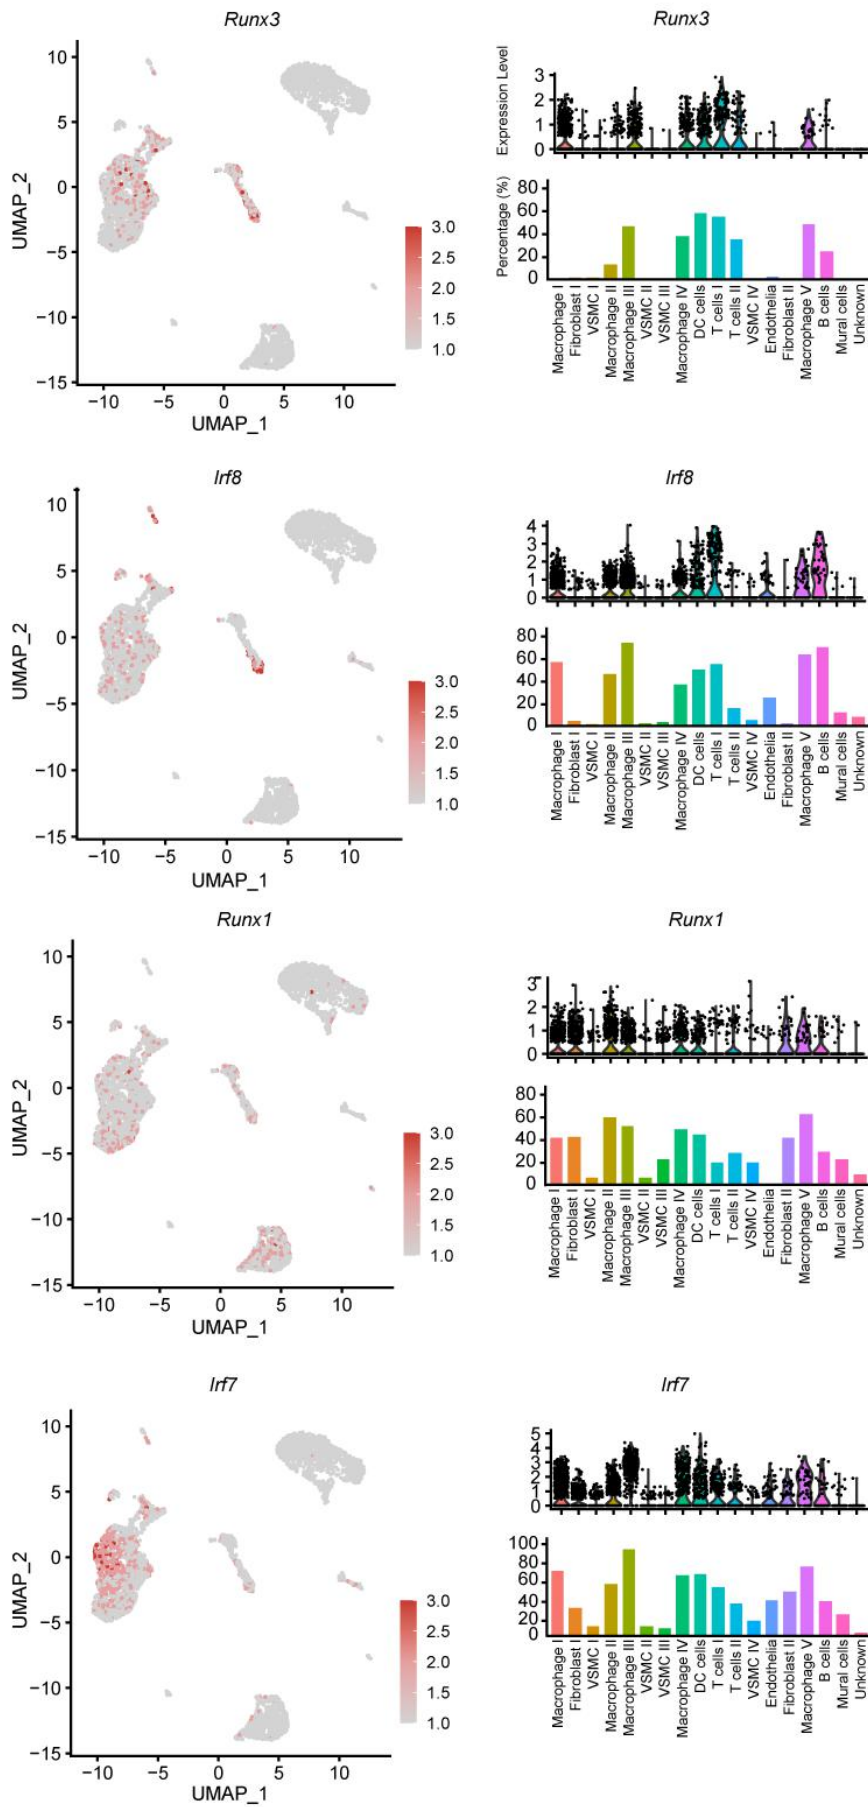

48 **Supplemental Figure 3. Cell-specific expression of top upregulated transcriptional**  
49 **factor genes in AAA adventitia.**

50 **(A)** Cluster analysis of single-cell sequencing data of elastase-induced AAA, with the  
51 relative expression of the top differentially expressed transcriptional factors (*Runx3*, *Irf8*,  
52 *Runx1*, and *Irf7*). The expression pattern of *Runx3*, *Irf8*, *Runx1*, and *Irf7* in each cell  
53 population (left), and their relative abundance in each cell population were shown on right.

54

55

56

57

58

59

60

61

62

63

64

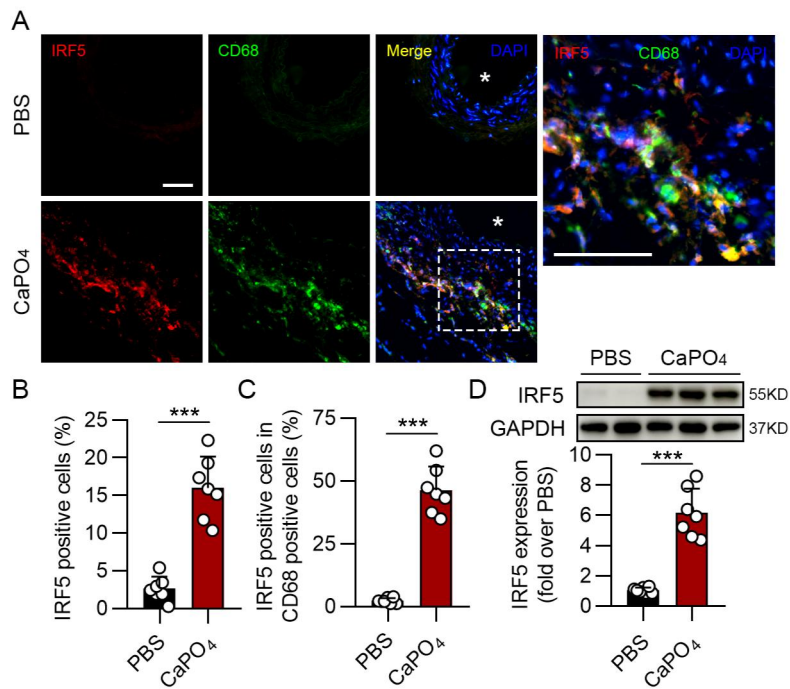

65

66 **Supplemental Figure 4. IRF5 expression in CaPO<sub>4</sub>-induced AAA.**

67 **(A)** Representative images of IRF5 and CD68 immunostaining in CaPO<sub>4</sub>-induced AAA  
 68 samples. \* indicates aortic lumen. Scale bar: 100 μm. **(B and C)** Quantification of IRF5 in  
 69 mice treated with PBS (n = 7) or CaPO<sub>4</sub> (n = 7). **(D)** Western blot suggested that IRF5  
 70 expression in CaPO<sub>4</sub>-induced AAA tissues was drastically increased compared to the PBS  
 71 group. Data in **(B-D)** are presented as mean ± s.d, and significance is determined by  
 72 unpaired two-tailed Student's *t*-test (\*\*\*)  $P < 0.001$ .

73

74

75

76

77

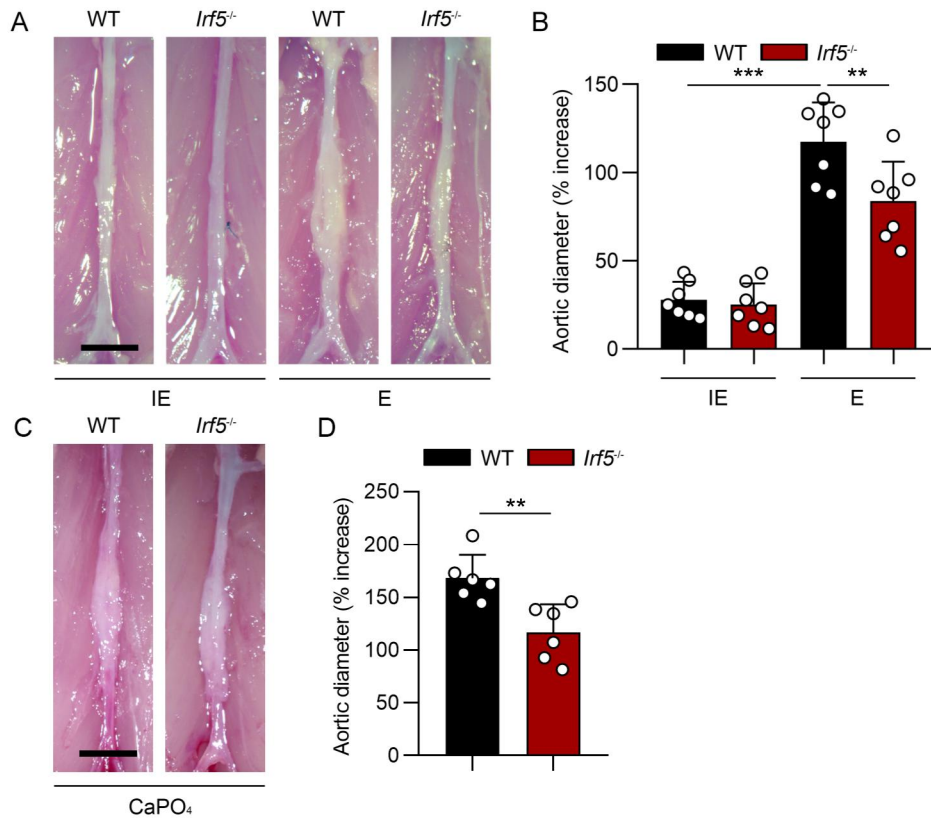

78

79 **Supplemental Figure 5. Global *Irf5* ablation alleviates AAA progression.**

80 (A and B) Wild type (WT) and *Irf5*<sup>-/-</sup> mice were administrated with inactive elastase (IE) or  
 81 elastase (E), and representative images were depicted. AAA development in *Irf5*<sup>-/-</sup> mice  
 82 was notably diminished compared to WT mice. (n = 7 in the WT mice with IE; n = 7 in *Irf5*<sup>-/-</sup>  
 83 mice with IE; n = 7 in the WT with E; n = 7 in the *Irf5*<sup>-/-</sup> with E) Scale bar: 2 mm. (C and D)  
 84 Representative images of WT mice and *Irf5*<sup>-/-</sup> mice treated with CaPO<sub>4</sub> for two weeks. *Irf5*<sup>-/-</sup>  
 85 mice had reduced aortic expansion. (n = 6 in the WT with CaPO<sub>4</sub>; n = 6 in the *Irf5*<sup>-/-</sup> with  
 86 CaPO<sub>4</sub>). Scale bar: 2 mm. Data are presented as mean ± s.d, and the significance is  
 87 determined by two-way ANOVA followed by Bonferroni test in (B) and unpaired two-tailed  
 88 Student's *t*-test in (D) (\*\**P* < 0.01, \*\*\**P* < 0.001).

89

90

91

92

93

94

95

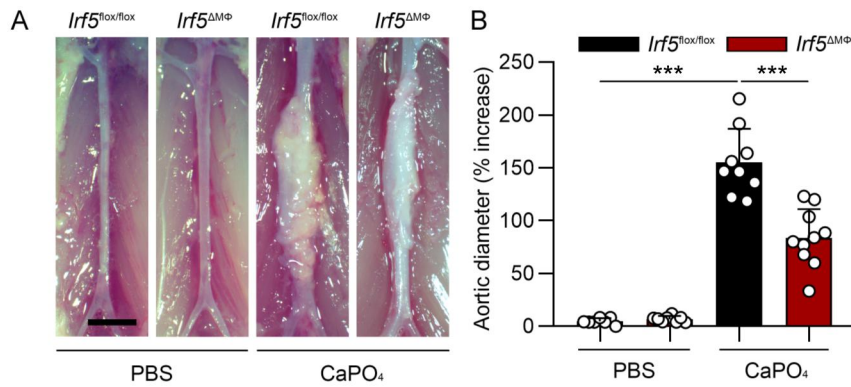

96

97 **Supplemental Figure 6. Myeloid cell-specific *Irf5* ablation mitigates CaPO<sub>4</sub>-induced**  
 98 **AAA.**

99 (A and B) Representative pictures of *Irf5<sup>flox/flox</sup>* and *Irf5<sup>ΔMΦ</sup>* mice treated with CaPO<sub>4</sub> or PBS  
 100 for two weeks. The *Irf5<sup>flox/flox</sup>* mice incubated with CaPO<sub>4</sub> had larger dilated diameters  
 101 compared to those with PBS treatment. Myeloid specific *Irf5* knockout strikingly reduced  
 102 aortic dilation. (n = 8 in the *Irf5<sup>flox/flox</sup>* mice with PBS; n = 7 in *Irf5<sup>ΔMΦ</sup>* mice with PBS; n = 9 in  
 103 the *Irf5<sup>flox/flox</sup>* with CaPO<sub>4</sub>; n = 10 in the *Irf5<sup>ΔMΦ</sup>* with CaPO<sub>4</sub>) Scale bar: 2 mm. Data in (B)  
 104 are presented as mean ± s.d, and the significance is determined by two-way ANOVA  
 105 followed by Bonferroni test (\*\*\**P* < 0.001).

106

107

108

109

110

111

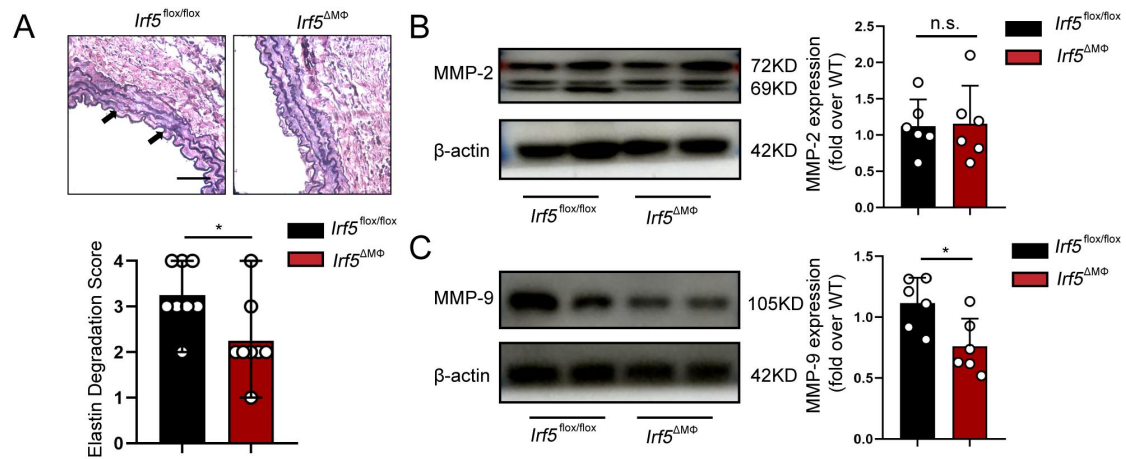

**Supplemental Figure 7. Elastin fragmentation and MMPs expressions in AAA tissues.**

(A) Representative images of Van Gieson staining and quantification of elastin degradation (n = 8 in the *Lrf5*<sup>flox/flox</sup> with E; n = 8 in the *Lrf5*<sup>ΔMΦ</sup> with E). scale bar: 50 μm. Data were represented as median (minimum and maximum) and the significance is determined by Mann-Whitney test (\**P* < 0.05). (B and C) Western blot analysis of MMP-2 and MMP-9 in aortic tissues from *Lrf5*<sup>flox/flox</sup> mice and *Lrf5*<sup>ΔMΦ</sup> mice (n = 6 in the *Lrf5*<sup>flox/flox</sup> with E; n = 6 in the *Lrf5*<sup>ΔMΦ</sup> with E). Data were presented as mean ± s.d., and the significance is determined by unpaired two-tailed Student's *t*-test (\**P* < 0.05, n.s., not significant).

112

113

114

115

116

117

118

119

120

121

122

123

124

125

126

127

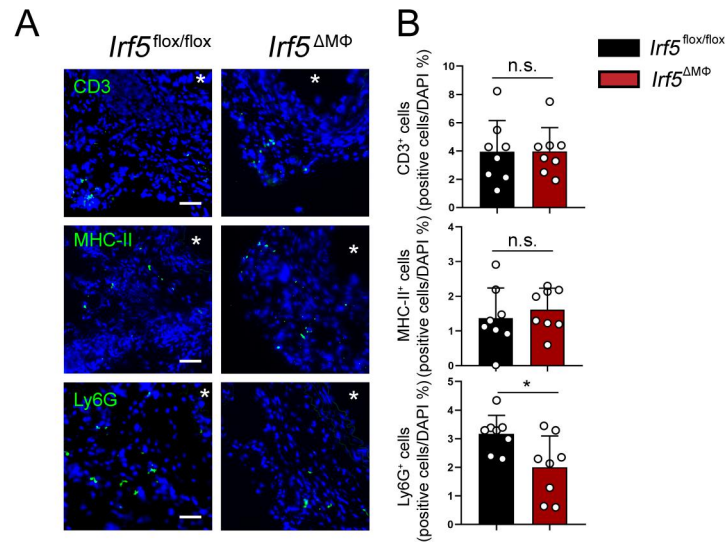

128

129 **Supplemental Figure 8. Infiltration of inflammatory cells in AAA tissues.**

130 (A) Representative images of immunofluorescence staining of CD3, MHC-II and Ly6G  
 131 from *Lrf5<sup>flox/flox</sup>* and *Lrf5<sup>ΔMΦ</sup>* mice subjected to elastase treatment (n = 8 in the *Lrf5<sup>flox/flox</sup>* with  
 132 E; n = 8 in the *Lrf5<sup>ΔMΦ</sup>* with E). (B) Quantification of CD3, MHC-II and Ly6G. \* indicates  
 133 aortic lumen. Scale bar: 100μm. Data in (B) are presented as mean ± s.d, and  
 134 significance is determined by unpaired two-tailed Student's *t*-test (\**P* < 0.05, n.s.  
 135 nonsignificant).

136

137

138

139

140

141

142

143

144

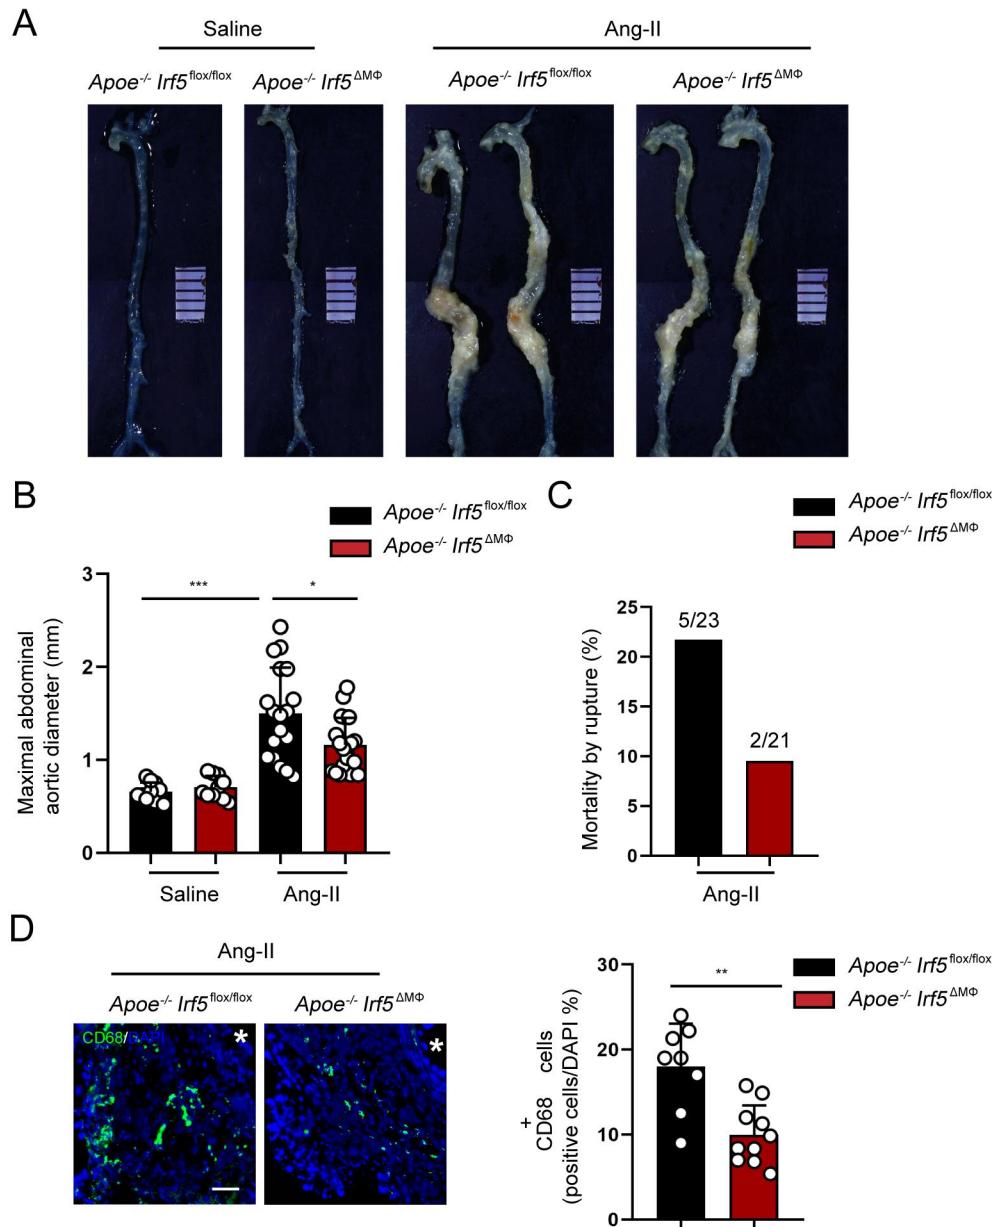

145

146 **Supplemental Figure 9. Myeloid cell-specific *Irf5* deletion attenuates Ang-II-induced**147 **AAA.**148 **(A and B)** Representative images of *Apoe*<sup>-/-</sup> *Irf5*<sup>flox/flox</sup> and *Apoe*<sup>-/-</sup> *Irf5*<sup>ΔMΦ</sup> mice infused with149 saline or Ang-II for 28 days. (n = 10 in the *Apoe*<sup>-/-</sup> *Irf5*<sup>flox/flox</sup> mice with saline; n = 10 in150 *Apoe*<sup>-/-</sup> *Irf5*<sup>ΔMΦ</sup> mice with saline; n = 18 in the *Apoe*<sup>-/-</sup> *Irf5*<sup>flox/flox</sup> with Ang-II; n = 19 in the151 *Apoe*<sup>-/-</sup> *Irf5*<sup>ΔMΦ</sup> with Ang-II). **(C)** The rupture rate in the Ang II-induced AAA between *Apoe*<sup>-/-</sup>152 *Irf5*<sup>flox/flox</sup> and *Apoe*<sup>-/-</sup> *Irf5*<sup>ΔMΦ</sup> mice. **(D)** Representative images of immunofluorescence153 staining of CD68 in AAA tissues from *Apoe*<sup>-/-</sup> *Irf5*<sup>flox/flox</sup> and *Apoe*<sup>-/-</sup> *Irf5*<sup>ΔMΦ</sup> mice treated with154 Ang-II (n = 8 in the *Apoe*<sup>-/-</sup> *Irf5*<sup>flox/flox</sup> with Ang-II; n = 10 in the *Apoe*<sup>-/-</sup> *Irf5*<sup>ΔMΦ</sup> with Ang-II).

155 The quantitative analysis of CD68 staining was present at right. \* indicates aortic lumen.

156 Scale bar: 100  $\mu$ m. Data are presented as mean  $\pm$  s.d, and the significance is determined  
157 by two-way ANOVA followed by Bonferroni test in **(B)** and unpaired two-tailed Student's  
158 *t*-test in **(D)** (\*\**P* < 0.01, \*\*\**P* < 0.001, n.s. nonsignificant).

159

160

161

162

163

164

165

166

167

168

169

170

171

172

173

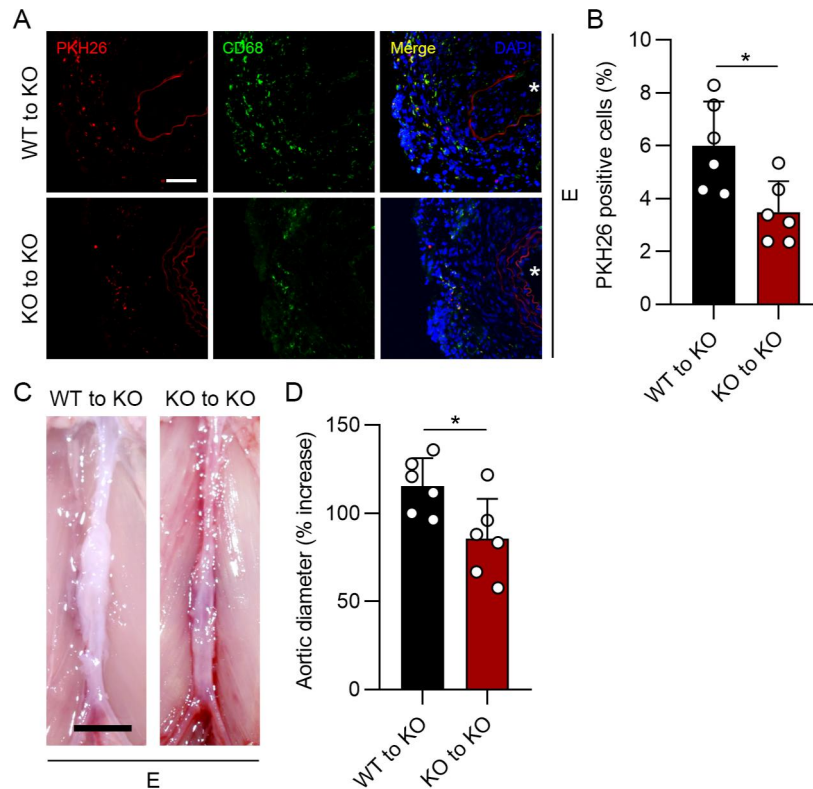

174

175 **Supplemental Figure 10. Adoptive monocyte transfer in mice subjected to elastase.**

176 (A and B) Representative immunofluorescence staining of PKH26 and CD68 in aortas  
 177 harvested from WT to KO mice and KO to KO mice (n = 6 in WT to KO mice with E; n = 6  
 178 in KO to KO mice with E). WT to KO mice had a larger number of PKH26 positive cells  
 179 than KO to KO mice. Quantification of PKH26 positive cells was shown at right.\* indicates  
 180 aortic lumen. Scale bar: 100  $\mu$ m. (C and D) Representative photomicrographs of WT to  
 181 KO mice and KO to KO mice challenged to elastase. .Scale bar: 2 mm. Data in (B and D)  
 182 are presented as mean  $\pm$  s.d, and the significance is determined by unpaired two-tailed  
 183 Student's *t*-test ( \**P* < 0.05)

184

185

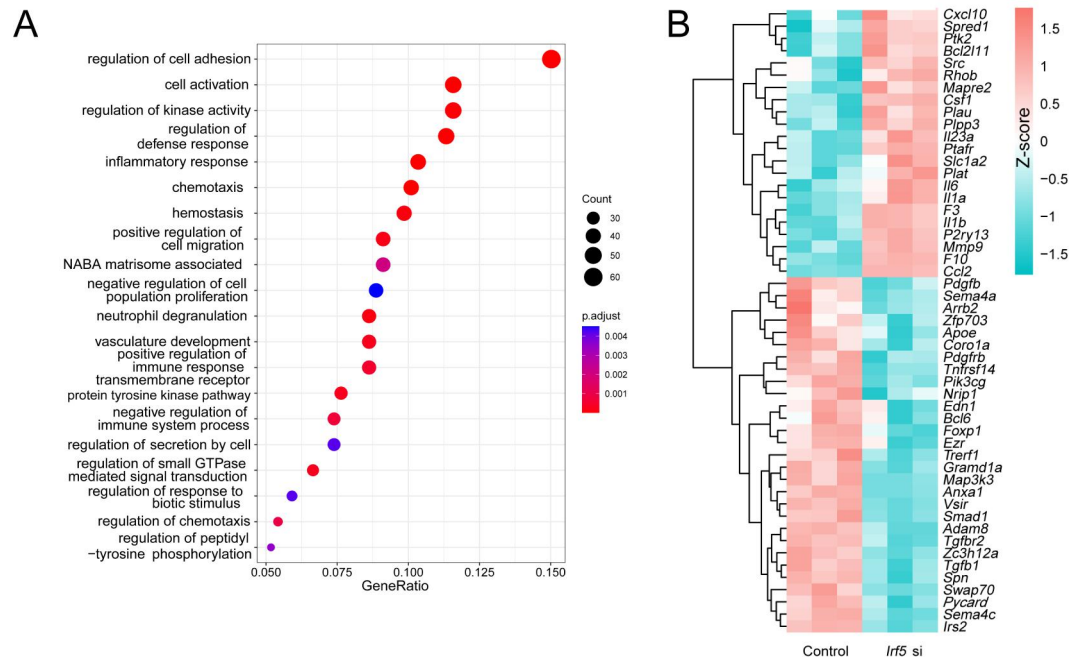

186

187 **Supplemental Figure 11.** *Irf5* silence in BMDMs alters migration related genes.188 **(A)** Dotplot represents enrichment analysis of genes corresponding to differentially189 expressed genes. Enrichment analysis was performed with Metascape with a cutoff *P*190 adjusted < 0.05 and log<sub>2</sub>fold change >1.**(B)** Heat map of migration related genes.

191

192

193

194

195

196

197

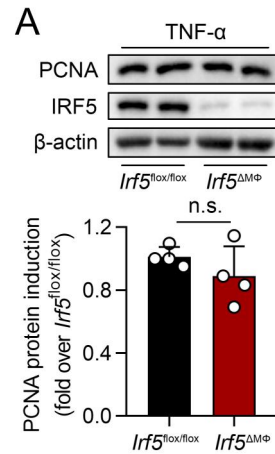

198

199 **Supplemental Figure 12. IRF5 does not affect macrophage proliferation in AAA.**

200 **(A)** Western blot analysis of PCNA expression in bone marrow-derived macrophages  
201 (BMDMs) from *Irf5<sup>flox/flox</sup>* and *Irf5 <sup>$\Delta$ M $\Phi$</sup>*  mice incubated with TNF- $\alpha$  (n = 4). *Irf5* deletion hardly  
202 affected expression levels of PCNA. Data are presented as mean  $\pm$  s.d, and the  
203 significance is determined by unpaired two-tailed Student's *t*-test in **(A)**(n.s., not  
204 significant).

205

206

207

208

209

210

211

212

213

214

215

216

217

218

219

220

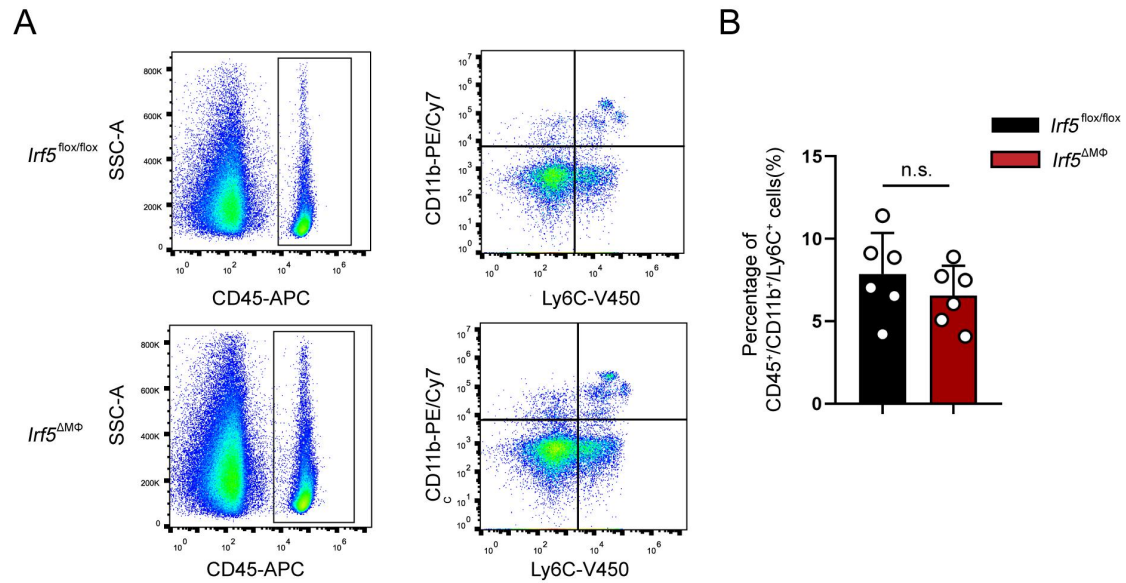

221

222 **Supplemental Figure 13. Circulating monocytes from from *Irf5*<sup>flox/flox</sup> and *Irf5*<sup>ΔMΦ</sup>**  
 223 **mice.**

224 **(A and B)** Representative flow cytometric analysis of monocytes (CD45<sup>+</sup>CD11b<sup>+</sup>Ly6C<sup>+</sup>) in  
 225 blood from *Irf5*<sup>flox/flox</sup> and *Irf5*<sup>ΔMΦ</sup> mice (n = 6). Quantification of macrophages by flow  
 226 cytometry was shown at the right. Data are presented as mean ± s.d, and the significance  
 227 is determined by unpaired two-tailed Student's *t*-test (n.s., not significant).

228

229

230

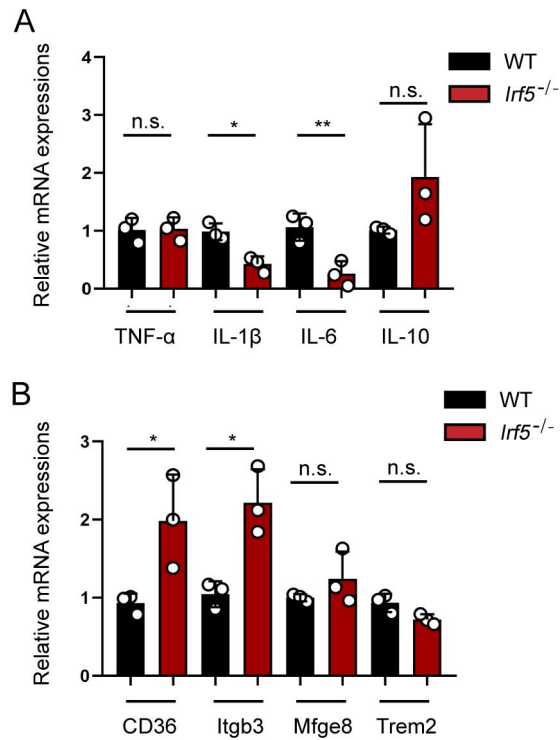

231

232 **Supplemental Figure 14. Expressions of cytokines and phagocytosis related genes**233 **in macrophages with *Irf5* deficiency**234 **(A and B)** The mRNA levels of cytokines and phagocytosis related genes (n = 3). Data235 was presented as mean  $\pm$  s.d, and the significance is determined by unpaired two-tailed236 Student's *t*-test (\* $P < 0.05$ , n.s., not significant).

237

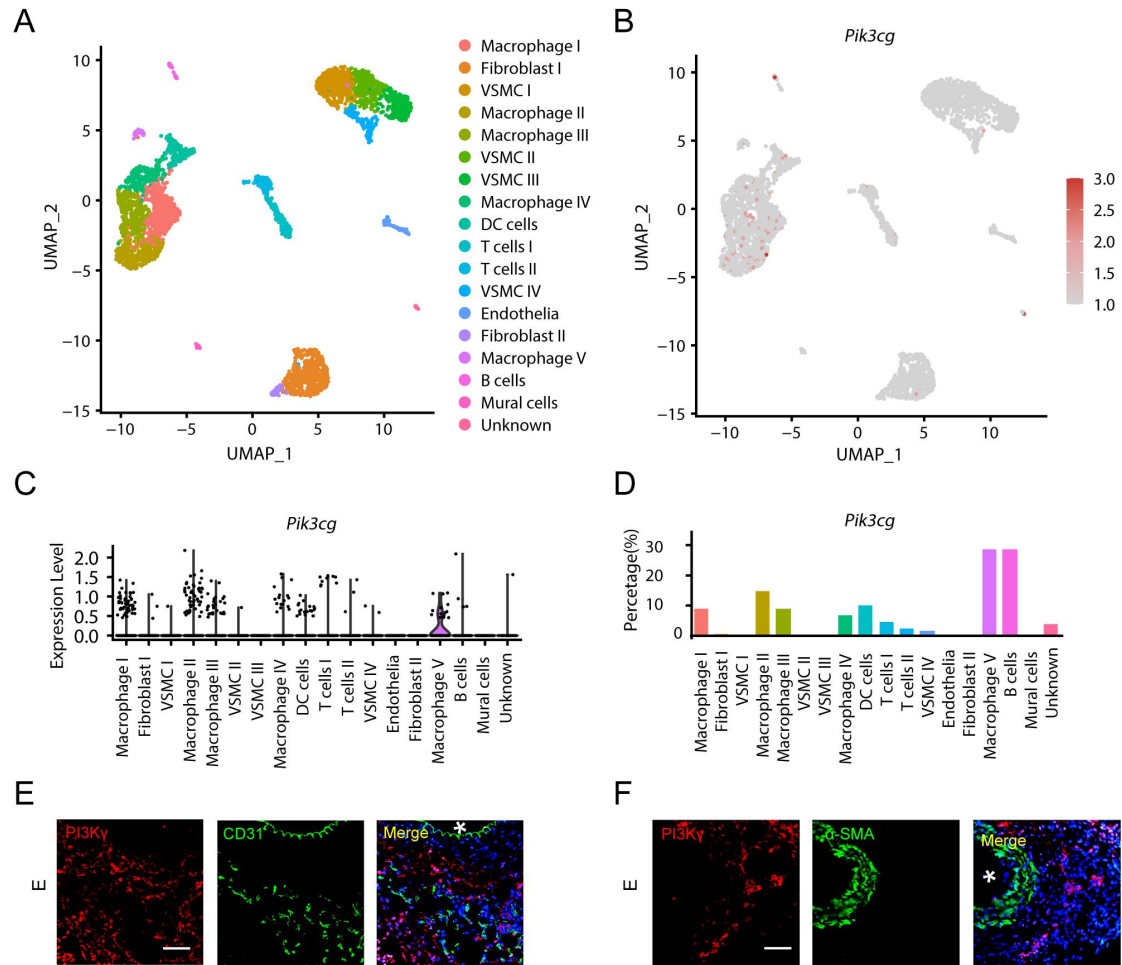

238

239 **Supplemental Figure 15. PI3Ky expression in the elastase-induced AAA.**240 **(A)** Cluster analysis of single-cell sequencing data of elastase-induced AAA. **(B)**241 Expression of *Pik3cg* for each cell population as visualized by feature plot. **(C)** Expression242 pattern of *Pik3cg* in each cell cluster as visualized by Violin plot. **(D)** The relative243 percentage of *Pik3cg* positive cells in each cell population. **(E and F)** Representative244 images of PI3Ky co-immunostaining with CD31 and  $\alpha$ -SMA in elastase-induced AAA245 tissues. Scale bar: 100  $\mu$ m. \* indicates aortic lumen.

246

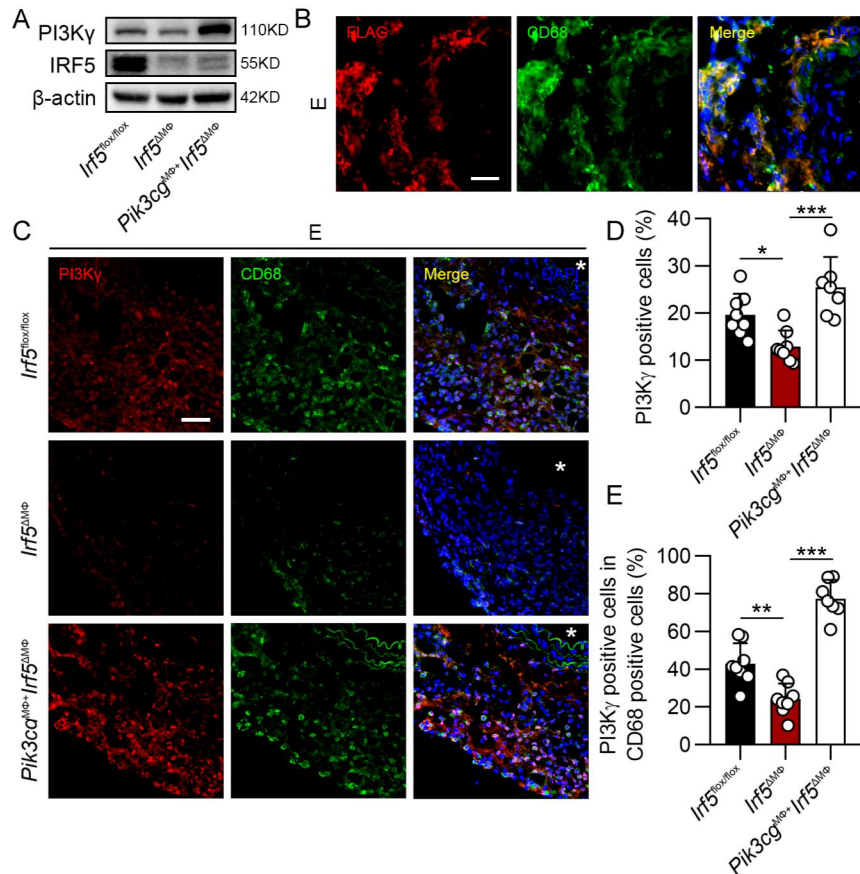

247

248 **Supplemental Figure 16. Overexpression efficacy of PI3Ky in *Pik3cg*<sup>M $\Phi$ +Irf5 $\Delta$ M $\Phi$</sup>  mice.**

249 (A) Western blot of IRF5 and PI3Ky expression in bone marrow-derived macrophages  
 250 (BMDM) from *Irf5*<sup>lox/lox</sup>, *Irf5* <sup>$\Delta$ M $\Phi$</sup> , and *Pik3cg*<sup>M $\Phi$ +Irf5 $\Delta$ M $\Phi$</sup>  mice. (B) Co-immunostaining of  
 251 FLAG and CD68 in aortas of *Pik3cg*<sup>M $\Phi$ +Irf5 $\Delta$ M $\Phi$</sup>  mice subjected to AAA induction to verify  
 252 the efficacy of PI3Ky overexpression in vivo. \* indicates aortic lumen. Scale bar: 100  $\mu$ m.  
 253 (C) Representative immunofluorescence stainings of PI3Ky and CD68 in AAA sections  
 254 from *Irf5*<sup>lox/lox</sup>, *Irf5* <sup>$\Delta$ M $\Phi$</sup>  and *Pik3cg*<sup>M $\Phi$ +Irf5 $\Delta$ M $\Phi$</sup>  mice (n = 8 in the *Irf5*<sup>lox/lox</sup> with E; n = 8 in the  
 255 *Irf5* <sup>$\Delta$ M $\Phi$</sup>  with E; n = 7 in the *Pik3cg*<sup>M $\Phi$ +Irf5 $\Delta$ M $\Phi$</sup>  mice with E). \* indicates aortic lumen. Scale  
 256 bar: 100  $\mu$ m. Quantitative analysis of PI3Ky levels was shown in (D and E). Data are  
 257 presented as mean  $\pm$  s.d, and the significance is determined by one-way ANOVA followed  
 258 by Bonferroni test in (D and E) (\* $P < 0.05$ , \*\* $P < 0.01$ , \*\*\* $P < 0.001$ ).

259

260

261

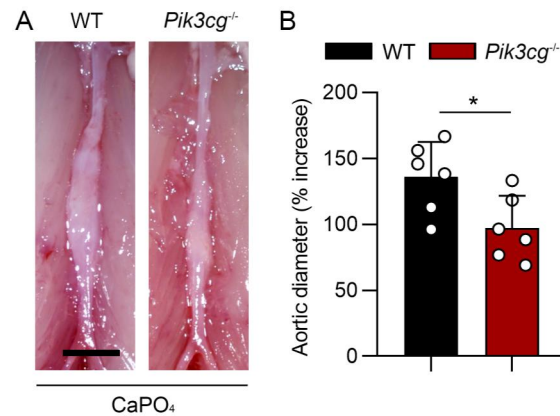

262

263 **Supplemental Figure 17. *Pik3cg* deficiency prevents CaPO<sub>4</sub>-induced AAA.**

264 (A and B) Representative images of wild type (WT) mice and *Pik3cg*<sup>-/-</sup> mice treated with  
265 CaPO<sub>4</sub>. AAA dilation was delayed in *Pik3cg*<sup>-/-</sup> mice, compared to WT mice. (n = 6 in the  
266 WT mice with CaPO<sub>4</sub>; n = 6 in *Pik3cg*<sup>-/-</sup> mice with CaPO<sub>4</sub>). Scale bar: 2 mm. Data are  
267 presented as mean ± s.d, and the significance is determined by unpaired two-tailed  
268 Student's *t*-test ( \**P* < 0.05).

269

270

271

272

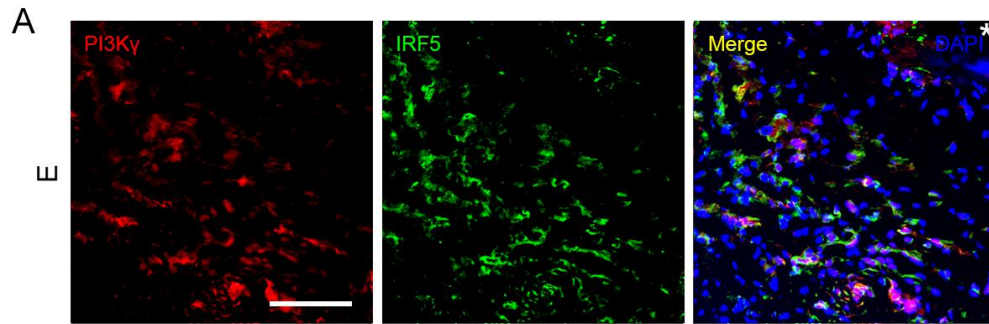

273

274 **Supplemental Figure 18. Colocalization of IRF5 and PI3K $\gamma$  in macrophages of AAA**275 **(A)** Dual immunofluorescence staining of IRF5 and PI3K $\gamma$  in aortas of elastase-induced276 AAA. IRF5 and PI3K $\gamma$  were co-localized in macrophages of AAA.\* indicates aortic lumen.277 Scale bar: 100  $\mu$ m.

278

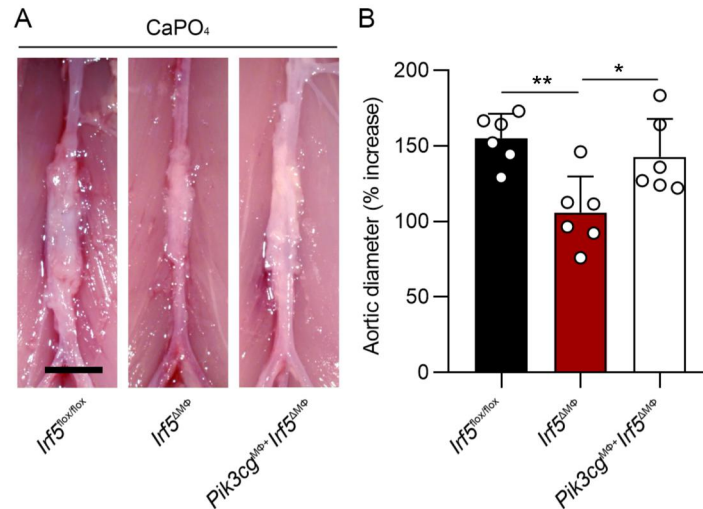

279

280 **Supplemental Figure 19. Myeloid cell-specific salvage of *Pik3cg* restores *Irf5***  
 281 **ablation CaPO<sub>4</sub>-induced AAA reduction.**

282 (A and B) Representative photos of *Irf5*<sup>flox/flox</sup>, *Irf5*<sup>ΔMΦ</sup> and *Pik3cg*<sup>MΦ+</sup>*Irf5*<sup>ΔMΦ</sup> mice  
 283 abdominal aortas followed by CaPO<sub>4</sub> incubation. *Pik3cg* overexpression with *Irf5* loss in  
 284 myeloid cells strikingly promoted aortic dilation compared to that with *Irf5*<sup>ΔMΦ</sup> mice. (n = 6  
 285 in the *Irf5*<sup>flox/flox</sup> with E; n = 6 in the *Irf5*<sup>ΔMΦ</sup> with E; n = 6 in the *Pik3cg*<sup>MΦ+</sup>*Irf5*<sup>ΔMΦ</sup> mice with E).  
 286 Scale bar: 2 mm. Data are presented as mean ± s.d, and the significance is determined by  
 287 one-way ANOVA followed by Bonferroni test (\**P* < 0.05, \*\**P* < 0.01).

288

289

290

291

292

293

294

295

296

297

298

299

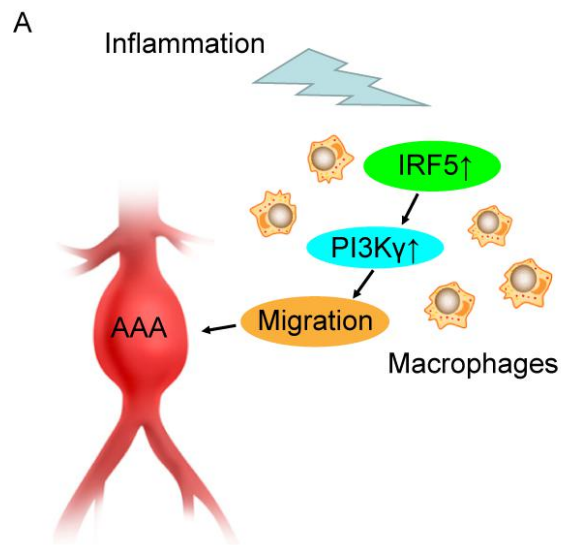

300

301 **Supplemental Figure 20. Representative schematic of macrophage IRF5-PI3K $\gamma$  in**  
302 **AAA progression.**

303 (A) In inflammatory environment, IRF5 of macrophages was elevated due to diverse  
304 stimuli. Elevated IRF5 upregulated PI3K $\gamma$  in macrophages, subsequently enhanced  
305 macrophage migration ability. Therefore, the increased macrophage migration and  
306 infiltration contributed to AAA development.

307

308

309

310

311

312

313

314

315

316

317

318

319

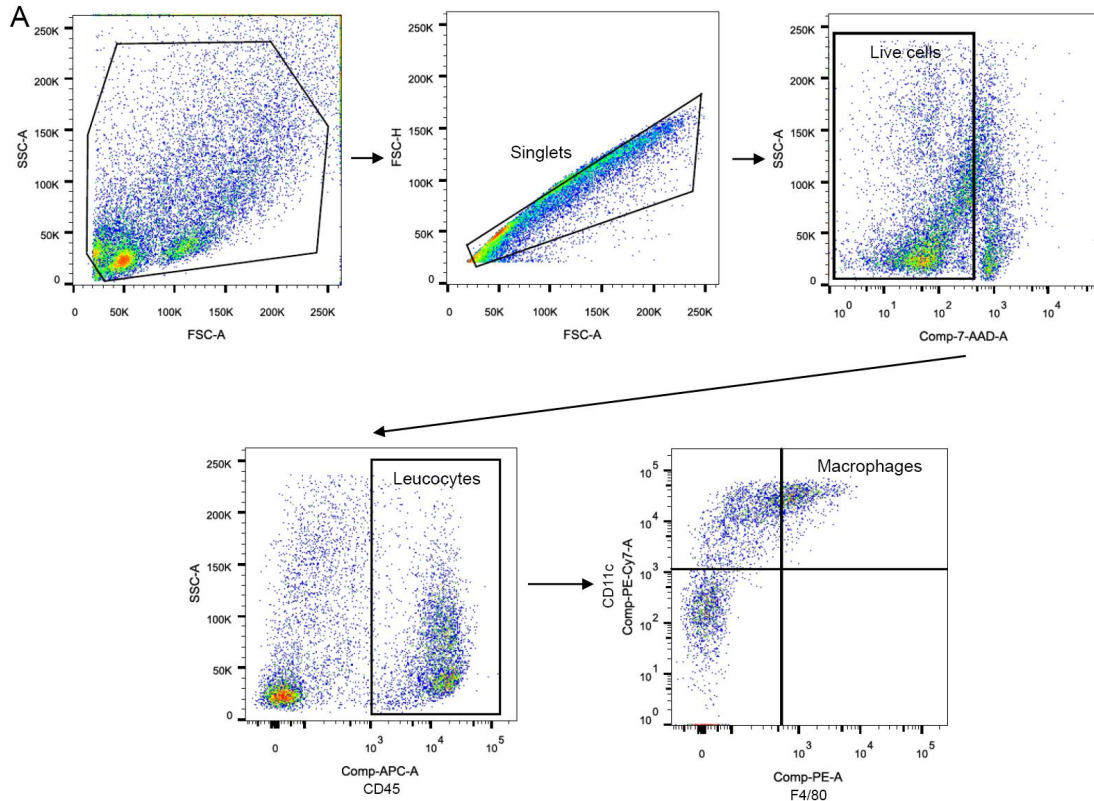

320

321 **Supplemental Figure 21. Flow cytometry gating strategy of macrophages**

322 (A) Representative dot plots and gating strategy for macrophages isolated from aortas  
323 with elastase perfusion. Population of singlets was gated on FSC-A/FSC-H dot plots.  
324 Unstained 7-AAD cells were regarded as live cells. Leukocytes were defined as CD45  
325 positive cells on SSC-A/CD45 dot plots. Population of macrophages was viewed as the  
326 CD11b<sup>+</sup>F4/80<sup>+</sup> populations in leukocytes.

327

328

329

330

331

332

333

334

335

336

337 **Supplemental Table I**

338

**Table 1 Clinical information**

339

| <b>Demographic</b>            | <b>AAA<br/>(n=5)</b> |
|-------------------------------|----------------------|
| Ethnicity (% han population)  | 5(100)               |
| Gender (% male)               | 3 (60)               |
| Age (SD)                      | 71.6 (7.3)           |
| BMI (SD)                      | 24.9 (4.1)           |
| Aortic Diameter (SD, mm)      | 44.6 (8.7)           |
| Blood pressure (mm Hg)        |                      |
| Systolic                      | 130 (17.6)           |
| Diastolic                     | 67.8 (9.6)           |
| Cholesterol (mmol/L)          | 4.6 (1.1)            |
| TG(mmol/L)                    | 1.4 (0.3)            |
| LDL(mmol/L)                   | 2.5 (0.9)            |
| HDL(mmol/L)                   | 1.2 (0.3)            |
| Medical conditions n (%)      |                      |
| Aspirin use                   | 3 (60)               |
| Other antithrombotics         | 2 (40)               |
| Statin use                    | 2 (40)               |
| $\beta$ -blocker use          | 1 (20)               |
| Tobacco abuse (prior/current) | 3 (60)               |
| Hypertension                  | 3 (60)               |
| Hyperlipidemia                | 2 (40.0)             |
| Coronary artery disease       | 1 (20)               |
| Diabetes                      | 0 (0)                |
| COPD                          | 1 (20.0)             |

340

Plus-minus values are means  $\pm$ SD.

341

342

343
